# Supplementary material for: Characterisation of a Novel Insect-Specific Virus Discovered in Rice Thrips, Haplothrips aculeatus
Source: MDPI journal article supplement (doi:10.3390/insects15050303), 2024-04-24
Supplement: s1 [file s1]

Supplementary Table S1. Primers used in this study.

| Primer | Position    | Sequence (5' to 3')    | Purpose                             |
|--------|-------------|------------------------|-------------------------------------|
| F1     | 1-21        | TTCATATAACCATTACGTCAAG | Amplification of RTOV1 viral genome |
| R1     | 1687-1706   | CGGCATCATGTGTCTTGCAG   |                                     |
| F2     | 1638-1657   | GCCTGTGTGTAATGTGTGAG   |                                     |
| R2     | 3325-3344   | GGTAGCAGGTCGGATAAGAC   |                                     |
| F3     | 3279-3298   | TGCACGTACGGATTGGCAGG   |                                     |
| R3     | 4962-4981   | TGTGCCGCGACATATTGTGC   |                                     |
| F4     | 4916-4935   | AGCATCCACTGACATCTCAC   |                                     |
| R4     | 6622-6641   | AGCAGAAGTGATTGGCACAG   |                                     |
| F5     | 6570-6589   | AGCTTATCAAGTCCCTTCTC   |                                     |
| R5     | 8287-8306   | GGACCCCAGAACAATGAGGG   |                                     |
| F6     | 8233-8252   | GGGTTACAGGGAATAGATC    |                                     |
| R6     | 9956-9975   | TGTCGAAGATGTTGCTCTCG   |                                     |
| F7     | 9906-9925   | CACTGCATTAGCATTGCCTG   |                                     |
| R7     | 11628-11647 | TTTAATCTACCTAGCCTTCC   |                                     |

|          |             |                               |                                      |
|----------|-------------|-------------------------------|--------------------------------------|
| F8       | 11584-11603 | ATGTCTGAGGACATTGGAGG          |                                      |
| R8       | 13309-13328 | TGGGCAATAAGCACAAACAC          |                                      |
| F9       | 13253-13272 | TGACTTGCTTGGGTGTGCTC          |                                      |
| R9       | 14975-14994 | CAATGGACAGTCTACCACCG          |                                      |
| F10      | 14926-14945 | CTGTTAGGCGGATTAGTTGC          |                                      |
| R10      | 16262-16282 | TGAACAAACGGACAAATATTG         |                                      |
| 5RACE-R1 | 4495-5023   | CATTCTGCTTGTGCCCAAACCACGGTTGC | 5'RACE of full RTOV1 genome sequence |
| 5RACE-R2 | 3272-3301   | GATCCTGCCAATCCGTACGTGCAAGAGGC |                                      |
| 3RACE-F1 | 16119-16146 | GGTGACCCACGCTCCAAGCATCATTTGG  | 3'RACE of full RTOV1 genome sequence |
