# Supplementary material for: Characterisation of a Novel Insect-Specific Virus Discovered in Rice Thrips, Haplothrips aculeatus
Source: MDPI journal article supplement (doi:10.3390/insects15050303), 2024-04-24
Supplement: s1 [file s1]

Supplementary Table S2. The BLAST results of RTOV1 compare to the NCBI NT and NR database.

| Blast program | Query sequence        | Top hit viruses                  | Query coverage | E-value | Identify | Accession      |
|---------------|-----------------------|----------------------------------|----------------|---------|----------|----------------|
| BlastX        | Full genome of RTOV1  | Chuviridae sp.                   | 38%            | 0       | 32.76%   | BDG58450.1     |
|               |                       | Chuviridae sp.                   | 38%            | 0       | 32.83%   | BDG58447.1     |
|               |                       | Chuviridae sp.                   | 38%            | 0       | 32.76%   | BDG58444.1     |
|               |                       | Beetle aliusvirus                | 59%            | 6e-22   | 21.74%   | WPR17560.1     |
|               | ORF1 protein of RTOV1 | Bat faecal associated chuvirus 3 | 53%            | 2e-20   | 21.74%   | UVF62170.1     |
|               |                       | Bat faecal associated chuvirus 2 | 53%            | 8e-18   | 22.04%   | UVF62166.1     |
| BlastP        | ORF3 protein of RTOV1 | ollusvirus 1                     | 65%            | 8e-19   | 21.61%   | WAB51682.1     |
|               |                       | Hubei coleoptera virus 3         | 46%            | 3e-18   | 21.45%   | YP_009336865.1 |
|               |                       | Culverton virus                  | 30%            | 3e-15   | 22.48%   | YP_010798360.1 |
|               | ORF4 protein of RTOV1 | Chuviridae sp.                   | 87%            | 0       | 32.09%   | BDG58444.1     |
|               |                       | Chuviridae sp.                   | 87%            | 0       | 32.09%   | BDG58450.1     |
|               |                       | Chuviridae sp.                   | 87%            | 0       | 32.15%   | BDG58447.1     |
