# Supplementary material for: Characterisation of a Novel Insect-Specific Virus Discovered in Rice Thrips, Haplothrips aculeatus
Source: MDPI journal article supplement (doi:10.3390/insects15050303), 2024-04-24
Supplement: s1 [file s1]

**The COI sequence of *Haplothrips aculeatus***

>ATTTAGATTACGATCCACTAATAGTATTGTTAAAGCTCCAGCTAATACTGGTAACGATAA  
TAATAATAGTAGGGAAGTAACTACAATAGATCAAATAAACAATCTAAAATATTCTATTTTT  
ATATTTGATATATTAAAAGTAGTTGAAATAAAATTAATTGAACCCAGTAAGGATGAAACC  
CCTGCAATATGTAAAGAAATAATGGTTATATCCACAGAAATCCCAACTCTTAAAGACGAT  
AAAGGAGGATAAATTGTTTCATCCAGTTCCTGAACCTCCTTCCAAAATTATTCTAAATAA  
AAGTAAAAATAAAGAAGGAGGTAACAACCAGAATCTTATATTATTTATACGTGGGTAAC  
ATATATCTGGGCTCCCCAGTATAATTGGAACCTAACCAATTTCCAAACCCTCCTATTATAAT  
AGGTATAATTGTGAAAAAAATTATTATAAAGGCATGATTAGTTACAATAACATTATAAGA  
TTGACCTGACAAAAAAATATTTTCCTGGCTGTATTAGTTCTAAACGAATAATTAAACTTAT  
AAATAATCCACAAATTCAGATCAAAATCCAAAAATAAAATATAATAT
