# Supplementary material for: Characterisation of a Novel Insect-Specific Virus Discovered in Rice Thrips, Haplothrips aculeatus
Source: MDPI journal article supplement (doi:10.3390/insects15050303), 2024-04-24
Supplement: s1 [file s1]

MDNYFRDQLMTPEDELQMLRKLFSSFRHFNKMYPNHKLIVQSFDfSKWNNNM  
MDNYFRDQLMTPEDELQMLRKLFSSFRHFNKMYPNHKLIVQSFDfSKWNNNM  
MDNYFRDQLMTPEDELQMLRKLFSSFRHFNKMYPNHKLIVQSFDfSKWNNNM  
MESYIPDQLMTQDELSTLKKLYSFRYYQMYPGHYVFMQMSFDfSRWNNNM  
MSLYDPRQLITPELSSIKKLFSSFRHYASMYHKLTLFQISFDfSKWNNRM

QYMDHYENDPEWSANVLEYLVIKLTAKELKEEKP<sub>2</sub>EGRMFGASPG<sub>2</sub>EERNRR!  
 QYMDHYENDPEWSANVLEYLVIKLTAKELKEEKP<sub>2</sub>EGRMFGASPG<sub>2</sub>EERNRR!  
 QYMDHYENDPEWSANVLEYLVIKLTAKELKEEKP<sub>2</sub>EGRMFGASPG<sub>2</sub>EERNRR!  
 QYMDHYENDPEWSANVLEYLVIKLTAKELKEEKP<sub>2</sub>EGRMFGASPG<sub>2</sub>EERNRR!  
 QYMHYEHDDPWRNAVLDYLVIKLTPKELEHK<sub>2</sub>EGRMFGASPG<sub>2</sub>EERNRR!  
 KYLSEIKKSEGVSEMKDYLVIKLTAKELKEEKAEGRMFGASPAVERNRR!

SPRFWDGQLGGIEGLNQATWSVIFLCGIKQALEGLGVTYQLTVKGDDVRAA

SDFWDGQLGGIEGLNQATWSVIFLCGIKQALEGLGVTYQLTVKGDDVRAA

SDFWDGQLGGIEGLNQATWSVIFLCGIKQALEGLGVTYQLTVKGDDVRAA

SDFWDGQLGGIEGLNQATWSVIFLCGIKQALEGLGVTYQLTVKGDDVRAA

KRYWEGQFGGIEGLNQATWSLVFLGGIKNALERIGVMYQVTVKGDDVRAA

YHTWVNQLGGIEGLAPVWTSIFGAFLVSALEPHFPLFDISYKGDDVRAA

A H L L S M R P F V A K V V A A L Y E V S P F Y I V Q E I L S K F M E S S T I F A F E T R G K T G N  
 A H L L S M R P F V A K V V A A L Y E V S P F Y I V Q E I L S K F M E S S T I F A F E T R G K T G N  
 A H L L S M R P F V A K V V A A L Y E V S P F Y I V Q E I L S K F M E S S T I F A F E T R G K T G N  
 E I L W S M L P Y C A K V A T V L W E C S P F Y V V D E V L S K F L Q S Q T V F K F L S M S R R G R  
 A H L L S M K P Y A A K V A T M L W E C S P F Y V V E E V L A K F T Q S S T I F Q F L T P Y T A N

| Name                      | p-value   | Motif Locations                                                                     |
|---------------------------|-----------|-------------------------------------------------------------------------------------|
| Rice thrips ollusvirus 1  | 1.39e-192 |  |
| BDG58444.1 Chuviridae sp. | 2.28e-293 |  |
| BDG58450.1 Chuviridae sp. | 2.28e-293 |  |
| BDG58447.1 Chuviridae sp. | 2.28e-293 |  |
| WAB51683.1 ollusvirus 1   | 1.01e-204 |  |

| Motif | Symbol                                                                              | Motif Consensus                                    |
|-------|-------------------------------------------------------------------------------------|----------------------------------------------------|
| 1.    |  | MDNYFRDQLMTPDELQMLRKLFSFRHFNKMYPNHKLIQVSFDFSKWNMM  |
| 2.    |  | MGWQLNPHECFVSLVSATSKQYQNDTFPLSPGVKKMKMWSLSNLIFFT   |
| 3.    |  | QYMDHEDEPEWSANVLEVLVLTKALEKEKPEGRMGKSGPEERNRI      |
| 4.    |  | SDFWDGGLQGLTEGIGNATWSVFLCGTQKALEGLGVTYQLTVKGGDVRAA |
| 5.    |  | AHLLSMRFVFAVVAALYEVSPFYIVQELLSKFMESSTIFAFFTRGKTGN  |
