# Supplementary material for: Characterisation of a Novel Insect-Specific Virus Discovered in Rice Thrips, Haplothrips aculeatus
Source: MDPI journal article supplement (doi:10.3390/insects15050303), 2024-04-24
Supplement: s1 [file s1]

### Three ORFs amino acid sequence of RTOV1

>L protein

MAKSDPPDWREDLTNAFVKQRPRYYRRGRAPKRYVTDSRAFMVDEKFDTMLDLYPYAT  
WQQELAEIMTWDAEFINEWSSVISRDCMHQLGVTQDICSATLTPCIIAKMVNLALKR  
NIYRSTTSKVSDKTLREKACLASLEAVLHQYDHMSSAVTPRIMANFHTKPREKIVEKFKCL  
PAEVEILGSVVEDCMRVMSEIKMLHKYVRIKDGRARARFRLHRRLENPWMRLDSLGVRL  
LLTRDVSILEVEGRTYLVNHDLLMMINKLVELWSLMLYCHFQDGTNQDEGIYTLQKDFIV  
HITDLVLRSGKFGDSTATLTQANKGLYCKSLEGLFVAECIYRHDFIKGWDNQTLGKTLWK  
ALKEEGLPIASEWRKSVLVKMFKEYTMPQIAEVIGTVKIAGHPSIEVEKGLDKLYERTHEL  
LEIDSDAVQKTIGVLTRELFMNFHRVHGHYPLCELRADLHGAIIRRTIIERLGPTHVALAAF  
KNTDALEWSKVLLKNAEFDVPDNQLQILKDKALGVTRSKILQVIFGTMPTHEETLTMKT  
ENRRALIHFLNDHYSSEFHKYLSEIKKSEGVSEMVKDYLVIKLTAKELKAEGRMFGAS  
PAVERNRRIVNDKNVMDMMSLYDPRQLITPDELSIIKKLFSFRHYASMYHKHTLFQISFDFS  
KWNNRMRKESIDVPAQEFYDRFYGESYIGRTMHMFNNTLYYYARISKNITKRNLTLNDV  
SEDLFQLALASLEKTTKKVQDSELRKTLLHKQGQELLA AVQANPSIQNWVTLLERCNIWIG  
KYHTWVNQLGGIEGLAQPVWTSIFGAFLVSALEPHFPLFDISYKGDDVRAVIAPDEAVKN  
KGHDGVRQQIMDVMRGLCDQMGWELNPNESFVSLSVICTSKQYQVNDTWLPASNKKM  
MKMMSMSNLVFPTLPDLIGSIYSTAHSACAQTVALPAYCAATYCAAREMLREFGEMSVD  
ADGLTALLWPQILGGPGPLPLQTFMIRGENDMLSIVAALYTHVFQGTSPGLSHRLRSILQV  
PMKKTPDKAMLLADPYSVPISAPEQPQAVLKRMMKTSMAKWVRNKDIRSLLSAQGLAD  
KTKYVAHLLSMKPAAKVATMLWECSFPYVVEEVLAKFQTSSTIFQFLTTPYTANEDRAR  
ARRAAYRALDKMLDAAQRCLVFWISKIVSNRFIKAQSMLGIPMTHWLSTTTCPTQLTMMI  
REKAWNREIIGLTYP SLVVQNMVGSIDELRMLHPNWRLDNIVNNIYVQLHNASSQTDTDS  
YHYRAVKGNVPWL GAYTRNDLADVDYRFRIRSTTSLKLLKLFELWKCGESLGPSFQQSV  
KVHIQALTSYPLKEALALVPEVGGGHLAHRGVIASTSRVTMNNARPNI MQGVRYESEGLSI  
LKGDQTDYSLNYAARQYISILLATWPLQFSLALPEDYPQLLHAYLHWDLAHPDTYRCPY  
CLNDIGDVMITFMLRCPTETKYRKLTLVGTSKIELNELKRCVNEVVAGRIRRTATQMYLDP  
ANPYVQEACAFVVRKFRLQGQTIQDVHIMNRAQRIPGPQLSELFAATSGYRPAAGLSINL  
LRALPVTLLYKSVVMEVLEALLQSLPDLDFDSTIVFDIAPHWNPLYQFFQTLIHAALLQN  
LNLGSTITITQEDWRLSPLQWRAGDNTNAQNAALTFCRHVYPIFRRWIKGEELLPRLIISVI  
QPDPTVTQILHNKVSSLAHALARKLIRRSNTSAKQGILNYFRLETHNEIEAYKVRVDQAE  
YVQEIRDLCDQILDDILIGGGIGLMAETLSTNLLHLACNVTLDDWVDAGNLTHIDDLPALQ  
TSDPVDIMSLKIGEPFPPSDTALVSGTLIEDIGRRCDKWVLRFALWFSYHLSQTSLVMWEGS  
MSDIVQSMLETHKAWLSPFSTIRLCLVTAEDARRVFKHRFDELA AELLAYYDEQTEWQRL  
PEHDWARLPNRNVCQLTAVQHTWTQNMHMPHPVLIGSVPSLDWDVLSPILVYLPEGDPL  
RGIRLDPREFTRCIGHLNTSASKLTLLLDLTGYVPPEDIIGHYGIMCLADGLAGQTRYCLTH  
YTQAIVVYNSLLLNPITGQPVQDASITELPLEIISGGLPREAIGRLKYKGLYPGDLSLPEVIQ  
VLCAYS AELHEVSLITFDADRNWSSEP KDYARIIFNIMWLCRRVLTDPGLVIVKLLPTADQS  
TMQVLVYWLILFEHAHIIRCPVTRSHSWEIYLIGRGVRPVPEQDIIDLREGTRVLPANPNLE  
GLVCEALQPIFDGVRSYIIDGFSNAPHPFGAYRRMLRQQAQPLALQQLVSGFHIEYPQRLT

HLCGWLDELRSRCIVAQESLQSLFRTMNAPNQRPLRLLGRRRQPLASGERLLTSYFTKLCT  
MAFVREAVSSYNVGQTYPSLDSLENHLKNAQAHLLESCMEELIDQLLTNPNTINVSNMHYT  
IQGGCLLLDDQRKENITTLLRYQAQRWMRIIGTWSYISYVHSENPQLFESLHRHWIESPV  
LRCHEAMIETHTNDRHYPVPFSPDIRLTPEEAILPEGVPYFR

>N protein

MSRLTLAQLRGACRARQGIPLVAGLSTMTMQRMAVAKPLCPQAFGDISQEVDPVRYTWY  
SRIACTGLYVRHMGQINDWNDEQLTSNLIAELGVTWVYDAPDTPAPINEARQKLIRVIRQ  
SITQEDIDTVLHYYVENLYKPEYLGLETEPITVGTMTQQASLQFTAFHKHMLNAVPIHLFQN  
PAHHVFRDAILLSGGVEDVALDDPGMGAAAGAGNANAVNQNPANDTTVADDWANQV  
QDWDFQTILNFCHILGIADLNQTMSTAFGAAATLIAVLCKGESVTQNWVVRRAAAVGVIIH  
GAMDNDKFNFAVVSIAKAYKRDNIPLDDLKYLITTYFSTTGLDTRPYAWMVEQAALS  
HITPAIAFAHSIQSMHWANLSYLHTLIPRTQFVNFHILTLMLYCNPYGGILNPPIPSAHYADV  
AYIGLALEKKLDARTTYNQYRGQPRDTIKTRRELDIVQTMVDQSQSIMDDERTLAKIFT  
QLLNVRGTEDGDYCYIPVDNNAALQNVAYEGYVGPVPQLGDQDGNQAAMVAGAIIDNE  
REEEIRMATRADWPAKKRLLPRNFARLNRSMAQAILNNEPQLMKDVRTCCEVLYSISKQ  
TSVFNEYTMNAANTQLRVTVTKQLNQELIDIQRRNEIPNAGLCLAPAEHKIITVNIAPAND  
DITADSIFNHGDILVTYAIWNNQDVAVHPGYQASVNLPGFRPAHHQPPQAPPAGVPPNNA  
ANAANAALNAAVGGGAGQQLQAAGQVGGNNNGPQNNEGIILEQMDGLGEDLFPVNPQ  
NAAGGGGEEEEQEEEEQPENEQDDGQQ

>G protein

MILENQSVKLLALFRHIAPRCSKEHIQMMLGAWVTTSVVFMLWVLLSHSPWACAQDPPK  
HQLVDDGMNTMIKNETLMFGELGLVLTKIPSVYAVYGSWNYHISLPIPCITGVELGDFNHN  
FKNYDNSLTSLFEQLNRTEIIPGLKNSIRHLEATQRIAQTSFRNILDLSLMNIKQDMETGW  
GGIFEPLCDEDIHPLPNQRVTAKGLLATSPAPDHNTNGTSTTPWSSIPVTTERPTTPVHPAS  
ATTSRAKNAAHTGTQTKSGRLVAENMRVDPAMELRTGALLRGKLMSHTAKSKSYKTPAT  
PVLPAVPDPNEVLIDGVSSPSNPSLKPESPDVVETFNADHTSMSWSPATPPIRWTTPLPISST  
AAPPASTTSPSFSTTLRASTVKPPETTTSGATGVHGSATTLNNGQSTTVSAEIDSFTGATNPP  
NSNDTMSMIQELVEAMGRSKRSIYQIRSVSEPIQQDGTTVSNPPYQQRMHNTHTVHNHNY  
EGLFKGSGSFVQVMGGVVNLAPNSGEDPGKVTLTGTPAAEPPPSAERSSPVEALNKEEYN  
RLTNQYAAAYCSRVPLEDVENCVAPMRRTTYCTDQCKQDFVVHARSHLPEVETMKLADR  
YTAWDDATLNLTYTVLRSVAGPHLTNDVLEDIVEVSNKMHRGRRSNFFAHLWGACSTEER  
DAMAAKIESLSTQVGAVHDFTTESIRNMDSLVSAKLAAVDDVVLMSRNFNDIATQHNNR  
LDELRSALLNHTIIVTLIHQLTTMNLYLMSQLKSNEHVQNMEIKMRSLQNTLKTGTISSTL  
VTADEIRRATLTISQNLDPGYMLAPVTTLADYYKAPMAKMMLYKSKIYLLQLQFDILPSYQ  
SYATYQVTALPVAVGSRWFHLRDLPEVFSIHKEAKEPFAWSIMSQAIIYKKGMDHPLHTLK  
DGMTTGRDWGANCLAKLLSHNPSYNISCVLAEANPNVAAVTERTYIAQVGLNMWAISTN  
TTHKVLLHCLDTMSTPKQVIIHVTTMKIPGQCSINGPAFRLIPYNAALGSTTFTREVYFPY  
QLVWGNVSVVPWPVPPSLRPSKWVSQVPSVEDLDSLIGNHTLHINNLMIDYKAKQAKTSA

KFNATVEGAKLREMLASMSMNFASWASWVLSAVLILAVIGLIICYCVCVRSNPAVRGASLLG  
SIPLQRVAAEVANGTSIVVVNATTTTTIAPPLSNASLIQQIGKVL DHTMSTIQSSFWTPYLFH  
TLLWLTGIGLMSFYFYCHVKCLQRVKRRLLVATNWT PRTMNVIIHHEGEVKLR LWFII SVK  
HLWRKDNITTEAAIQASTLVGNWSDWTCEFNSSQPSFIKAQTFKRWQQVFRIK VSWGSLC  
LKSSRYPVLDTCAELPDYLEVKASEILAQCHDVMPWTWGSVEFLNICRVEVIPSQAINLFT  
NYGS
