# Supplementary material for: Characterisation of a Novel Insect-Specific Virus Discovered in Rice Thrips, Haplothrips aculeatus
Source: MDPI journal article supplement (doi:10.3390/insects15050303), 2024-04-24
Supplement: s1 [file s1]

## The full genome sequence of RTOV1

>TTCATATACCATACGTCAAGGGCATGCGATGCTTAGCCAGCAATACGACATGGGGTA  
GGAAACAACGGATAGATTTTAAAAAACTACAAAAAGAAAGATAATTCTACACGCATAG  
AGGCCAAATAGCTGAAAAACTAAAAGTCACCTGGCCACATCAGTCCGGTACCTCAAAC  
CGCGACTCCGCGCCTTTTAAAGATTCACATATCTTGCAAATATAGGTCATTCAACGAAAAT  
AGGGCACTCCCTCCGGGAGTATAGCCTCTTCTGGGGTCAGCCTTATGTCTGGACTAAAG  
GGTGGCGGTACATAGTGCCTGTCATTTGTGTGAGTTTCAATCATGGCTTCATGACAACA  
CCTAAGGACTGGTGATTCAATCCAATGTCGGTGTAAGACTCAAATAGTTGTGGATTTT  
CACTATGAACATATGAGATGTAGGACCAAGTTCCTATGATGCGCATCCATCGCTGAGCT  
TGATAGCGAAGTAAGGTGGTGATATTCTCCTTGCGTTGATCATCGAGGAGCAAAAGACA  
TCCACCCTGAATTGTATAATGCATGTTGGAGACATTGATGGTTGGATTAGTCAACAATTG  
ATCTATCAATTCCTCCATACAGGATTCTAATAAGTGTGCTTGAGCGTTTTTCAAATGATT  
TTCTAAACTATCCAGGCTAGGGTATGTCTGACCTACATTGTAGCTGCTCACTGCCTCTCT  
CACAAAGGCCATTGTGCATAATTTTGTGAAGTATGAGGTCAAGAGCCTTTTACCAGATG  
CTAAGGGTTGCCTTCTACGGCCCAACAGCCGTAGGGGTCGTTGGTTGGGAGCATTGAT  
TGTGCGGAATAGACTTTTGCAAGGATTCTTGTGCGACAATACACCTCGACCGCAGTTGCG  
TCAAGCCATCCACATAGATGTGTCAGTCGCTGTGGTACTCTATATGGAACCCTGAAAC  
CAACTGTTGCAGAGCAAGCGGTTGTGCTTGTGGCGTAGCATTGCTCTGTAGGCACCA  
AATGGATGTGGTGCATTGCTAAAGCCGTCAATGATATAGGATCTGACCCCGTCAAATAT  
GGGTTGAAGGGCCTCACACACCAACCCCTCTAAATTGGGATTTGCTGGTAGTACACGG  
GTCCCCTCTCGTAAGTCAATGATATCCTGTTTCAAGGTACAGGGCGCACGCCCCGCCCTAT  
CAAGTATATCTCCCATGAGTGACTTCTAGTTACCGGACACCGAATAATGTGTGCATGCTC  
AAAGAGTATCAACCAGTAACTAGAACTTGCATGGTACTTTGATCTGCTGTGGGCAAC  
AATTTGACTATCACTAGGCCATCAGGAGTTAGAACTCGACGACACAACCACATGATATT  
GAAGATGATCCTAGCATAATCTTTTGGTTCACTGGACCAGTTCCTATCTGCATCAAATGT  
TATCAACGACACTTCATGTAACCTCTGCACTATATGCGCATAACACCTGAATTACCTCGGG  
TAATGAAAGATCCCCAGGGTACAAGCCCTTGTAAGTTCAGTCTCCCTATGGCTTCTCTGG  
GCAGTCCCTCCAGAGATGATTTCTAATGGTAGCTCTGTTATGCTGGCGTCCTGGACAGGT  
TGACCCGTTATCGGATTGAGTAAGAGACTATTATAAACCACAATAGCCTGTGTGTAATGT  
GTGAGGCAGTACCGTGTTTGACCTGCAAGACCATCTGCAAGACACATGATGCCGTAAT  
GCCCCGATTATGTCTTCTGGTGGCACATAACCGGTGAGATCTAACAATAGCGTCAATTTG  
GAGGCTGATGTATTGAGATGGCCTATGCACCGCGTAAACTCTCGTGGGTCCAGTCGAAT  
GCCACGTAAAGGATCACCTTCTGGAAGATATACCAATATGGGGGATAAGACATCCCAGT  
CAAGTGATGGCACACTACCGATGAGAACTGGGTGTGGCATATGCATGTTCTGAGTCCA  
AGTGTGTTGAACAGCAGTGAGCTGACAAACATTTTCGGTTTGGTAGGCGTGCCCAATCA  
TGTTCTGGCAACCTTTGCCATTCTGTTTGTTCATCATAATATGCTAGTAGCTCAGCTGCT  
AGTTCATCAAATCTGTGTTTAAACACACGACGAGCATCTTCAGCTGTCACCAAGCATAA  
TCGTATGGTAGAAAAGGGTGACAGCCATGCCTTGTGAGTCTCTAGCATGCTTTGCACAA  
TGTCAGACATTGAGCCCTCCCACATTACTAAGGAAGTCTGGGACAGGTGGTAACTAAA  
CCACAATGCGAACCTCAGAACCCACTTATCACACCTACGGCCAATGTCTTCGATCAGG  
GTTCCACTCACCAATGCGGTGTCTGAAGGTGGGAAGGGTTCCCCTATCTTCAGACTCAT

TATGTCGACAGGATCCGAGGTCTGTAACGCTGGGAGGTCATCTATATGTGTCAGGTTAC  
CAGCATCAACCCAATCGTCAAGAGTAACATTACATGCTAGATGCAGCAGATTAGTGGAC  
AGAGTCTCTGCCATAAGCCCTATCCCCCTCCGATCAATATGTCGTCCAGGATTTGATCA  
CACAAATCGCGAATCTCCTGTACGTACTCTGCCTGATCAACCCGAACTTTGTATGCTTCT  
ATCTCGTTGTGTGTCTCCAACCGAAAATAGTTGAGAATTCCCTGCTTAGCTGATGTATTG  
GATCTCCGTATGAGCTTTTCGAGCAAGTGCGTGAGCAAGTGAACACCTTGTTGTGGA  
GGATTTGTGTCAGTGTGTTGTGGATCAGGCTGGATCACGGAGATGATCAATCGCGGCAGT  
AATTCTTCACCTTTGATCCAGCGCCTGAATATTGGGTACACGTGGCGACAGAAAGTCA  
AAGCAGCATTCTGGGCATTGGTGTATCACCAGCTCTCCATTGCAGTGGACTCAGCCGC  
CAGTCTTCCTGTGTTATAGTGATGGTAGATCCTAGGTTCAAGTTTTGCAGCAAAGCTGC  
GTGGATGAGTGTCTGGAAGAATTGGTACAACGGATTCCAATGTGGCGCTATAAAGTCA  
AACACAATTGTGCTGTCAAAATCCAAGTCAGGAAGTGAAGCAGAGCTTCCAGC  
ACCTCCATGACTACACTCTTGTACAACAAAGTGACCGGTAATGCCCTCAGTAGATTGAT  
ACTTAGCCCTGCTGCAGGCCTGTAACCTGATGTAGCAGCAAATAATTCCGACAATTGAG  
GTCCTGGGATCCTCTGAGCTCTATTCAATTATATGGACATCCTGAATGGTTTGTCTTGCA  
ATCTAAACTTACGCACTACTGCAAAAGCACACGCCTCTTGACGTACGGATTGGCAGG  
ATCAAGATACATCTGTGTGGCTGTTTCGTCTTATCCGACCTGCTACCACTTCGTTACACA  
CCTCTTTAACTCATTAAAGTTCTATCTTGAAGTACCCACCAATGTAAGTTTCCGGTACTT  
AGTGATTTCTGTTGGACAACGTAACATGAATGTTATCATAACATCCCCAATGTCGTTTCA  
GCAGTAAGGACAAGGACGGTACGTGTCAGGATGTGCCAAATCCTCAATGCAGGTATGCA  
TGAAGGAGTTGCGGATAGTCTTCTGGCAGCGGAGGCTAAACTGTAAGGGCCAAGTA  
GCTAATAAGATTGAGATATACTGTGAGCTGCATAATTGAGGCTGTAATCTGTCTGATCA  
CCTTTCAATATACTTAAGCCTTCACTTTCATAACGCACACCCTGCATGATGTTTGGTCTA  
GCATTGTTTCATGGTCACGCGTGAGGTGGATGCAATCACACCACGGTGAGCCAAATGGC  
CTCCACCCACCTCTGGGACTAAGGCTAGAGCTTCTTTCAATGGGTAGGATGTCAAGGC  
CTGAATGTGGACTTTCACTGATTGTTGGAACTCGGGCCGAGACTCTCACCACATTTCC  
ATAGCTCAAAGAGCTTTTTCACTTTGATAGTGTTGTAGATCGTATCCTGAACCTATAAT  
CTACATCTGCTAAATCATTGCGGGTGTAAGCTCCTAACCATGGCACATTCCCTTTGACC  
GCTCGATAATGATACGAGTCAGTGTCGGTTTGTGAGCTTGCATTGTGAAGTTGTACATA  
GATGTTGTTTACAATGTTGTCTAGACGCCAATTGGGATGTAGCATCCTTAATTCATCAAT  
ACTACCCACCATATTCTGAACTACCAAACCTCGGGTATGTGAGGCCTATGATTTCTCGGTT  
CCAAGCTTTTTTACGAATCATCATGGTCAACTGAGTAGGACATGTGGTAGTTGATAACC  
AGTGTGTCATTGGGATCCCTAACATAGATTGAGCTTTTATGAACCTATTTGAGACAATCT  
TTGACCAAAAAACCAGGCAACGTTGTGCTGCATCGAGCATCTTATCCAGTGCTCTGTA  
CGCTGCCCTCCTGGCGCGGGCTCGATCCTCATTGTCAGTATATGGAGTGGTCAAGA  
GGAAATTTGTGCTACTCTGAGTGAATTTAGCTAACACCTCTTCCACCACATAGAATGGG  
CTACACTCCCACAACATTGTTGCCACTTTAGCTGCATAAGGTTTCATGGACAGAAGGTG  
GGCTACATATTTGGTTTTATCTGCCAAACCTTGTGCTGATAACAAGGATCTGATGTCCTT  
ATTTCCGACCCATTTTGCCATACTAGTCTTCATCATTCTTTTCAGCACAGCTTGTGGCTG  
TTCCGGGCGCTGAAATAGGTACCGAGTAGGGATCTGCTAATAGCATTGCCTTGTCTGGGG  
TCTTCTTCATTGGGACCTGTAAAATTGATCTTAGTCTGTGGCTGAGCCCAGGACTTCCT

GTCTGGAAGACATGTGTGTATAATGCAACAATTGCTGATAACATGTCATTCTCGCCTCTT  
ATCATAAATGTTTGTAGAGGGAGGGGCCCTGGACCTCCTAATATCTGTGGCCACAGGAG  
CAAAGCAGTTAGGCCATCAGCATCCACTGACATCTCACCGAACCTCTCGTAACATTTCTC  
GAGCAGCACAATATGTCGCGGCACAGTACGCTGGTAATGCAACCGTGGTTTGGGCACA  
AGCAGAATGAGCAGTTGAGTAGATACTCCCAATCAGGTCAGGCAATGTAGGGAAAACC  
AAGTTAGACATGGACATCATCTTCATCATCTTCTTGTGGATGCTGGGAGCCATGTATCA  
TTGACCTGGTATTGTTTACTAGTGCAGATCACGCTTAGGGATACAAAAGATTCATTGGG  
GTTCAATTCCCAACCCATTTGATCACAGAGTCCACGCATCACATCCATAATCTGCTGTCT  
GACACCGTCATGTCCTTTGTTTTTTACTGCCTCATCTGGCACTGCAATGACAGCTCGCA  
CATCATCTCCTTTGTATGAGATGTCGAATAACGGAAAATGTGGCTCCAGCGCGCTGACA  
AGGAAGGCTCCAAATATTGATGTCCAGACTGGTTGTGCCAACCCCTTCGATGCCCCCTAA  
TTGATTTACCCATGTATGGTATTTTCCGATCCAGATATTACATCTCTCTAACAAAGTGACC  
CAGTTCTGGATACTAGGATTAGCTTGCACAGCAGCTAGTAGCTCTTGTCTTGTATGT  
AATGTCTTACGTAACCTCGCTATCCTGGACTTTTTTGGTCGTTTTTCAAGTGATGCCAAA  
GCCAGTTGGAACAAGTCCTCTGATACATCGTTTAGGAGTGTGAGATTCTCTTGGTTAT  
ATTCTTACTGATACGGGCATAATAACAATGTGTTATTGAACATGTGCATTGTACGACC  
GATATACGATTCACCATAAAAACGATCATAAACTCTTGAGCAGGAACGTCAATAGACT  
CCTTCCTCATCCGATTATTCCACTTCGAGAAATCAAACTGATCTGGAACAGGGTATGC  
TTGTGGTACATTGATGCGTAATGTCTAAAGGAGAATAATTTCTTGATGATGCTCAACTCA  
TCTGGTGTGATCAACTGCCGCGGGTCATACAACGACATCATGTCCATCACATTCTTGTG  
ATTTACAATTCTCCTGTTTCTTTCCACAGCCGGACTAGCTCCAAACATGCGCCCTTCTG  
CTTTCAGCTCTAACTCCTTGGCAGTCAGTTTAATCACCAAGTAATCTTTCACCATCTCAG  
AAACCCCTCACTCTTCTTGATCTCACTCAGATACTTATGAAATTCAGATGAATAATGGT  
CATTGAGCAAGAAATGTATGAGTGCACGTCGATTTTCAGTTTTTCATTGTGAGGGTTTCT  
TCATGAGTGGGCATTGTGCCAAAGATAACTTGTAATATCTTACTACGTGTCACCCCCAA  
AGCTTTGTCTTTCAAGATTTGCAACTGGTTGTCTACCGGATCGAATTCGCATTCTTCA  
ACAATTTTACTTTTCGACCATTTCGAGGGCATCTGTGTTCTTGAATGCTGCGAGAGCCACC  
GGGTGTGTGGGGCCTAATCTCTCAATGATGGTTCGACGAATAGCGCCATGTAGGTCCGC  
TCTCAACTCACATAGTGGATAATGACCATGGACTCGATGAAAATTCATGAATAGCTCAC  
GTGTGAGGACTCCTATAGTCTTCTGCACTGCATCGGAGTCAATTTCCAACAATTCGTGT  
GTCCTTTCATAAAGCTTATCAAGTCCCTTCTCAACCTCAATACTAGGATGTCCAGCAATT  
TTAACTGTGCCAATCACTTCTGCTATCTGAGGCATTGTGTATTTCTCAAACATCTTGACC  
AGCACAGACTTCCTCCATTCTGAAGCAATTGGAAGTCCTTCCTCCTTTAATGCCTTCCA  
TAATGTTTTCCCAATGTTTGGTTATCCCATCCTTTGATAAAATCATGTCGGTAAATGCAT  
TCTGCTACAAACAAGCCTTCCAGTGATTTACAGTATAGGAACCCCTTGTTAGCCTGTGT  
CAAAGTGGCTGTGGAATCACCGAATTTCCCACTACGAAGGACCAAGTCAGTAATGTGC  
ACAATAAAATCCTTTTGCAGAGTGTAGATGCCCTCATCCTGATTAGTGCCATCTTGGA  
ATGACAATACAGCATTAGAGACCATAATTCCACTAGCTTGTTTATCATCATCAGTATGAG  
GTCATGGTTGACGAGGTATGTCCGACCCTCTACCTCCAATATGCTCACATCTCTCGTCAA  
TAGTAATCGGACACCTAAACTATCAAGTCTCATCCATGGATTTTCCAATCTACGATGAAG  
GCGGAACCTTGCTCGTGCTCTACCATCCTTAATCCTCACATACTTATGCAACATTTTTAT

CTCACTCATCACTCTCATACAATCTTCCACCACAGAACCTAGAATTTCCACTTCGGCTG  
GGAGGCATTTGAACTTCTCTACAATTTTCTCTCTAGGTTTAGTATGGAAGTTCGCCATAA  
TCCTCGGAGTGACCGCAGAAGACATGTGATCGTATTGGTGCAAGACTGCCTCGAGAGA  
TGCTAGACAGGCCTTCTCTCTCAGAGTTTTATCAGACACTTTTGATGTAGTCGAACGAT  
AGATGTTACGCTTAAGAGCAAGATTGACCATTTTCGCTATGATACAGGGTGTGAGTGTG  
GCTGAGCAAATATCTTGCGGAGTAACACCTAAGATCTGTAACCTCGTGCATACAGTCTCG  
ACTTATTACAGAAGACCATTCAATTTATGAACTCTGCATCCCAGGTCATGATCTCCGCTAA  
CTCTTGCTGCCACGTGGCGTAGGGATATAGGTCTAGCATTGTATCGAATTTCTCATCTAC  
CATAAACGCTCTAGAATCTGTCACATATCGTTTGGGGGCTCTGCCTCGTCTGTAGTACC  
GTGGTCGTTGTTTGACAAAAGCATTAGTCAAATCTTCCCGCCAATCAGGCGGATCGGA  
CTTTGCCATCCTCTAACAGCAAAGTTTAAGCGATCAAGGCAATACCTGAACTCAACAA  
AGATTGAGTTTTAAACCATGTGAATAATGTTTTTGTGCGCTTCACAAGTTTATTTTCAT  
TTTTTATTTTCCCTCTCACGCAGTGCAAATCACCAGCACCCCATCACCAAAAGTAAGTC  
ACTCTCCATCACCAATAGCTTCCCCACAGCAATAGATTTAAATTCTATCAACAGAGTATA  
ATCGGGGTCTACCACCCCGGGCTGCTAAGTACACATATAGCTGATACAAGGGCCATGTG  
TTAGCCACGCGTAGTACATCCCCAACAGGATGTTTAGCCATCAACACTTACTGTTGGCC  
ATCGTCTTGTTTCGTTTTCCGGTTGCTCTTCCTCCTGTTGCTCTTCCTCCCCACCACCTCC  
AGCAGCGTTTTGTGGGTTACAGGGAATAGATCTTCACCGAGACCGTCCATCTGTTCC  
AAGATTATGCCCTCATTGTTCTGGGGTCCATTGTTGTTGCCGCCGACCTGTCCCGCTGC  
CTGGAGCTGTTGACCTGCCCCTCCACCGACTGCAGCATTGAGAGCAGCATTTCGCAGCA  
TTAGCTGCGTTGTTTGGTGGTACTCCAGCTGGTGGCGCCTGTTGTGGTTGATGGTGAGC  
AGGTCTGAACCCATAGGGTAGGTTCACTGATGCCTGATATCCGGGGTGGACTGCAACG  
TCCTGATTGTTCCAGATGGCATATGTCACCAGAATATCCCCATGATTGAAGATGGAATCA  
GCAGTGATGTCATCATTAGCAGGTGCAATGTTACAGTGATGATCTTGTGTTCCGCAGG  
AGCTAAGCACAAACCAGCGTTCGGTATTTCAATTTCTTCTCTGGATGTCAATCAATTCCT  
GGTTCAGCTGCTTGTTACTGTCACTCGAAGTTGTGTATTTCGCGGCATTCATGGTGATC  
TCATTGAATACGGAGGTTTGTGTTGCTGATTGAGTACAGGACCTCACAGCACGTTCTCAC  
ATCCTTCATGAGTTGGGGCTCATTGTTGAGAATTGCTTGTGCCATCCCGGATCGATTGA  
GTCTTGCGAAATTTTCGGGGAAGCAATCTTTTCTTGGCTGGCCAATCTGCTCGTGTTGCC  
ATCCGAATCTCCTCTTCTCGTTCAATTGTGCGATGATGGCACCAGCGACCATAGCAGCTTG  
GTTACCATCTTGATCTCCCAATTGCGGGACCGGACCGACATAGCCTTCATATGCAACATT  
CTGGAGAGCCGCATTGTTATCCACTGGGATGTAGCAATAATCACCATCTTCAGTACCCC  
TTACATTGAGCAACTGGGTGAAAATCTTGGCTAAAGTGCGTTCATCATCCATGATTGAT  
TGGGATTGATCCACCATCGTCTGGACGATGGCGTCTAGTTCACGGCGGGTTTTTATAGT  
GTCTCTTGGCTGCCCTCTGTATTGATTGTAGGTTGTGCGTGCGTCTAGTTTCTTCTCTAA  
TGCCAATCCGATATATGCCACATCAGCGTAGTGCGCTGAAGGGATCGGAGGGTTAAGGA  
TTCTCCATACGGGTTGCAGTACATGAGCAAAGTCAGGTGAATGAAATTGACGAACTG  
GGTCCTAGGGATAAGTGTGTGCAAGTAGGAGAGATTGGCCCAGTGCATACTTTGGATC  
GAGTGAGCAAAAGCAATAGCTGGAGTGATATGACTCAATGCAGCTTGCTCGACCATCC  
ATGCATAAGGGCGAGTATCTAGCCCTGTTGTGCTGAAGTAGGTAGTGATGAGGTATTTT  
AAGAGGTCATCCAAAGGTATATTGTCCCTCTTGTAAGCCTTAGCAATGGACACAACAAC

CGCTTCATTGAACTTATCATTGAGGTCCATTGCGCCATGGATCACACCTACAGCAGCAG  
CCCGCCGGACAACCCAATTTTGAGTGACTGACTCGCCTTTGCACAATACCGCTATCAAT  
GTTGCAGCGGCTCCAAAAGCTGTAGACATGGTTTGATTAAAGTCAGCAATACCGAGGA  
TATGGCAGAAGTTGAGAATTGTTTGGAAGTCCCAATCCTGCACTTGGTTGGCCCAGTCA  
TCAGCCACTGTGGTGTCAATTGGCCAATGGGTTCTGATTCACTGCATTAGCATTGCCTGC  
GCCTGCAGCTGCGCCCATGCCTGGATCATCGAGAGCAACATCTTCGACACCTCCTGAC  
AGCAGGATGGCGTCTCGGAACACATGATGCGCAGGGTTCTGGAAAAGATGGATCGGA  
ACTGCATTAAGCATGTGCTTATGAAATGCAGTGAATTGGAGACTCGCCTGCTGGGTCA  
CGTACCCACGGTGATAGGCTCTGTGAGTCCTAGATATTCAGGCTTGTACAAATTTTCTAC  
ATAGTAATGCAGCACTGTGTCAATATCCTCTTGAGTGATACTTTGACGAATTACCCGAAT  
TAGTTTCTGCCGAGCCTCATTGATTGCCGGAGCTGTGGTGTGAGGGGCATCGTACACCC  
ATGTAACACCCAGTTCCGCAATTAGGTTTCGAGGTCAGTTGTTTCGTCAATTCCAGTCATTG  
ATTTGACCCATATGACGCACGTATAACCCGGTACAGGCGATTCTACTATACCATGTGTAA  
CGCACATCGGGGACCTCTTGCGAGATGTCACCAAATGCTTGGGGACACAGTGGTTTTG  
CAACCGCCATGCGTTGCATGGTCATAGTACTCAGGCCGGCCACTAAGGGTATGCCCTGA  
CGTGACGGCAGCTCCTAACCTCTGTGCTAACGTCAAGCGAGACATGATTTCAGCACA  
ATGCAGTTTGGCTTGTACACGTCAATGTATAACAACGTCCTAACTCAGGATGCAATTAA  
CGAATCAAAAGGGGAACAAACAATAGAGTTTTAAACCATGTATTTGTCCTTCGACAATT  
GTGTGTTGGCATATTTAGTCTGGTCCAACATATGTGAAAGCCAATGACCCCATGAGAAG  
CAAATGATTTTTTGCTATTATAGCTCAGTTACTTGCAGTTATCCCTGAGCCTGATGTTA  
ATACGTTTCTGGGCACGTCGTGTATCGAACTACTGTAAGTCATGTTTATATATGAGTTAT  
GGTGCAATGCCACTGCACATCCCCTTAGTGGAGTCAATAATAGTAGCATCTGTGATCAT  
GTTGTGTCGTCAGAACTGGAAAGCACCTCATAGAGCCCTGGTGCACAACAGTTGGTACTA  
CTTATAAGGATCTGATATGTGCCAACACGCATGATTGAGTCAATCACCTCACTTCACATT  
ACGCGATGCGGTGATGTCTCGTGCAGTACGCGGGTAATTGGAGGTGGTCACTTGGGGC  
CTGGATCTCAGCTCCAAGAGGAGATTCTTCTGCAGGGTCAACATAACCGTTATCTTGTC  
CAGCTTTGAGTCGATTGTTTGCAATGTCAGCTCCTGCTTCTGTCCGGGGGATACTGCGG  
CTATGGGGGTTTGACGGATAGCACTCATTGATTGCATGTTGCTGGGTGGTGCAGAGGG  
AGCGGCTTCACGAGTTTTTCATCATGTTGTTTCATGTTGGGCCTCATTCAAATGTTGCTAAT  
ACTGCAAGCAAGAAACCTGAGAGAAAAATACCAAAGTTTTAAACCACGATAAAGTGT  
TTGTTGTCCTTCAACGTGTGGCATTTTTTATTTTTATTTTTCTGAACACATGGTTAATAA  
TATAAGGATAATATCTTTGATTAAATGTCACAACAAGGTGGTCAATCTATGATTTCAGTAA  
ATTGTATGTCTTTCATTCATGCTACCCTTTACAACAATGCGCACAGTGTTTATCATTTATT  
TAATGTCTGAGGACATTGGAGGCATAATATCTGGCTTGCAAATTTAGGAAGGCTAGGTA  
GATTAAACCTCTGATAAAGGGATTGAACAGTAGATCAATTAAGGGCTGATTGGTATGCT  
ACTTGGCAATGCAACAGACCTGAACCTTGTGTGGGCAGTGTGGTTATTACGTACGCGA  
TTAGAAATACACCCCACTTAATCCCTTGTGGGCAACCTTAATCAAATACCCAGTAAATC  
CTTGTCATCATATCTGGTGATCATCACATGCTTATTCAGATCATCCATCAATGGACACTCT  
TAAGGAGTTATGATTAATAGTTAACTAAGAGGTATGCTATCCATATTATCCCAACTAGTAC  
TCAATCTCTTAACCCCTCCGAATATGACACTGGAAGATCTGGTGAGATCGTAAATAGAC  
ACTCCGGGGGCCACTTCTAGTCAGGATCCGTAATTGGTGAACAAGTTAATTGCCTGTGA

TGGGATTACCTCCACACGACATATGTTCAAGAATTCAACGCTCCCCACGTCCATGGCA  
TAACATCATGACACTGAGCCAAGATTTTCAGATGCCTTCACTTCAAGGTAGTCAGGCAG  
CTCAGCACAAGTGTCAAGGACCGGATAACGACTACTCTTCAGACACAGTGAACCCCAT  
GATACCTTGATCCGAAAGACTTGCTGCCATCGTTTGAATGTTTGCGCCTTGATGAAGGA  
TGGTTGCGAACTATTGAACTCACAGGTCCAGTCCGACCAATTCCCAACCAAGGTTGAG  
GCTTGATAGCCGCCTCTGTGGTAATGTTGTCTTTGCGCCACAGATGCTTCACACTTATT  
ATGAACCAAAGTCTTAACTTTACTTCACCTTCATGATGGATTACGTTTCATGGTTCTTGGT  
GTCCAGTTGGTGGCAACGAGCAAGCGACGCTTCACACGCTGCAAGCATTTGACATGG  
CAATAAAAGTAGAAGGACATCAATCCAATTCCGGTTAGCCATAGAAGTGTGTGGAATA  
GATAAGGTGTCCAGAAGCTGCTTTGAATAGTGCTCATAGTGTGGTCCAATACTTTCCCA  
ATTTGCTGGATGAGACTGGCATTGCTCAACGGGGGGGCAATTGTGGTTGTGGTTGTTG  
CATTGACCACCACAATACTAGTCCCATTAGCAACCTCAGCTGCCACTCTCTGTAATGGT  
ATTGAACCAAGGAGCGAAGCTCCTCTCACAGCTGGATTAGAGCGTACACACACACAGT  
AGATAATAAGACCTATGACTGCCAGGATCAGCACAGCTGACAGAACCCAGCTGGCCCA  
AGAGGCAAAATTCATGCTCATACTGGCCAACATTTGCGCGCAGTTTAGCACCCCTCTACAG  
TGGCATTGAACTTTGCTGATGTCTTTGCCTGCTTAGCTTTGTAGTCAATCATCAGATTGT  
TAATATGGAGCGTATGATTCCCGATCAGTGAATCTAGGTCTTCCACAGATGGGACTTGT  
GATACCCATTTACTTGGTCTTAAGCTGGGAGGCACCCATGGGACAACACTAACATTCCC  
CCACACAAGTTGGTAAGGGAAATAAACTTCACGTGTAAATGTTGTGCTTCCCAATGCG  
GCATTGTAAGGGATTAATCGGAATGCAGGTCCATTAATGGAGCATTGACCCGGAATTTT  
CATGGTGGTCACATGTTTCGATGATGACTTGCTTGGGTGTGCTCATAGTATCCAAACAGT  
GTAACAAGACCTTGTGTGTAGTGTTTGTGCTTATTGCCCACATATTTAGTCCAACCTGA  
GCTATATATGTCCTTTCAGTGACAGCAGCTACATTGGGATTGGCTTCAGCCAGGACACA  
GCTGATATTGTAGCTAGGATTGTGGGACAGGAGTTTTGCTAAGCAGTTAGCTCCCCAAT  
CTCTACCAGTAGTCATTCCATCTTTCAAAGTGTGCAGTGGGTGATCCATACCCTTCTTGT  
AAATTGCCTGACTCATGATTGACCAAGCAAATGGTTCCTTTGCTTCCTTGTGTATCGAG  
AATACTTCCGGCAAGTCGCGGAGATGGAACCACCGACTCCCCACTGCTACAGGGAGTG  
CTGTCACTTGGTAAGTTGCATAACTCTGATAGGAGGGCAAGATGTCAAATTGCAATTGG  
AGATAGATTTTGGATTATAAAGCATCATCTTCGCCATAGGTGCTTTGTAGTAATCAGCT  
AGGGTTGTGACAGGGGCAAGCATATAACCATCTGGCAGATTCTGAGAGATAGTTAAAG  
TAGCTCGTCGAATCTCATCAGCTGTGACAAGTGTGAGGAAATGGTGCCAGTCTTGAG  
AGTGTCTGTAGAGAACGCATTTTGAATTTCCATATTTTGTACATGTAGTTCATTAGACTT  
CAGCTGAGACATTAGGTATAGGTTTCATAGTCGTTAGTTGGTGTATTAGAGTGAATGAT  
AGTATGGTTGAGCAGTGCTGATCGCAGCTCATCTAGTCGATTGTTGTGTTGTGTAGCGA  
TGTCATTGAAGTTTCTTGACATCCGCAGCACCATCATCGACTGCTGCTAACTTGGCT  
GATACAAGTGAATCCATATTCCGTATTGACTCAGTTGTGAAATCATGAACAGCGCCCAC  
TTGAGTTGATAACGATTCAATTTTGGCAGCCATTGCATCTCGTTCTTCAGTGCTACAAG  
CTCCCCATAAGTGTGCAAAGAAATTGCTGCGTCGTCCTCGGTGCATCTTGTTAGATACC  
TCGACTATATCTTCTAGCACGTCATTGGTGAGGTGAGGGCCAGCAACTGACCGGAGCA  
CTGTATATGTCAGATTCAAGGTTGCATCATCCCATGCGGTATACCGATCCGCATCCAATT  
TCATCGTCTCAACTTCAGGGAGGTGACTCCGTGCATGGACGACAAAATCTTGTTTGCAT

TGGTCAGTGCAATAGGTTGTACGTCGCATCGGCGCTACACAGTTCTCAACATCTTCAAG  
CGGCACACGGCTACAATAAGCTGCATACTGATTGGTCAACCTGTTGTATTCCTCCTTGT  
TCAAAGCTTCTACTGGGCTGGATCTTTCAGCACTGGGAGGAGGTTCTGCTGCCGGGGT  
CCCTAAGAGTGTACCTTCCCTGGGTCTTCACCAGAGTTAGGGGCTAAATTCACCACC  
CCTCCCATAACCTGGACAAATGACCCGCTACCTTTAAATAGGCCTTCATAATTGTGATTG  
TGGATGACATGAGTGTTATGCATGCGTTGTTGGTAAGGCGGGTTGGACACTGTTGTGCC  
ATCCTGCTGGATTGGCTCAGACACTGACCGGATTTGGTAAATTGATCTCTTGGAACGAC  
CCATCGCTCAACCAACTCTTGGATCATGGACATGGTATCATTGCTGTTAGGCGGATTA  
GTTGCTCCAGTGAAGGAGTCAATTTCTGCAGACACGGTGGTAGACTGTCCATTGGACA  
AAGTTGTTGCACTACCGTGAACCTCCTGTCGCCCCAGATGTGGTGGTCTCCGGAGGTTT  
CACTGTACTAGCTCGTAGTGTGGTGGAAGCTAGGACTGGTAGTGGATGCAGGGGGA  
GCAGCTGTACTGCTGATTGGGAGAGGAGTGGTCCATCTGATTGGGGGGGTAGCTGGAG  
ACCAACTCATACTAGTGTGATCAGCAACATTGAATGTTTCCACAACATCAGGCGATTCT  
GGCTTCAGACTTGGATTGGACGGTGAGCTTACACCATCTATGAGTACCTCATTGGGATC  
TGGGACTGCTGGGAGTACTGGGGTTGCTGGTGTCTTGTAAGATTTGATTTGGCTGTAT  
GTGACATCAACTTGCCTCGTAACAAGGCTCCGGTGCGCAATTCCATGGCAGGGTCGAC  
CCTCATATTCTCTGCCACCAATCTACCTGATTTTGTCTGGGTCCCTGTGTGAGCCGCATT  
TTTGGCTCTACTGGTTGTTGCTGATGCCGGGTGGACTGGAGGTGTAGTTGGTCTCTCGG  
TAGTCACTGGGATACTTGACCAGGGTGTGGTTGAAGTACCATTTCGTGTTGTGGTCAGG  
AGCTGGGCTAGTGGCGAGTAAACCTTTTGCTGTTACCCGTTGGTTGGGCAAAGGATGG  
ATATCTTCGTCACACAGGGGTTCTGAATATTCGCCCCACCCTGTTTCCATATCCTGTTTG  
ATGTTTCATGAGTGAATCTAGGATGTTTCTAAACTAGTCTGTGCGATGCGTTGTGTGGC  
CTCCAGATGACGGATAGAATTCTTGAGTCCCGGATCAATTATGATTTCCGTGCGATTGA  
GTTGTTTCGAAAAGACTGGTGAGGCTGTTATCATAATTCTTGAAATTATGATTGAAATCA  
CCCAGCTCGACCCCAGTTATGCAGGGGATAGGTAGGGATATGTGATAATCCAAGAACC  
ATAAACAGCATACACAGATGGTATCTTTGTGAGCACAAGACCAAGTTCCCCAAACATC  
AGGGTCTCATTCTTGATCATGGTGTTTCATACCATCGTCAACTAATTGGTGTTTGGGCGGA  
TCTTGGGCGCAGGCCCATGGGCTATGACTGAGCAAAACCCAGAGCATGAACACCACA  
GAAGTGGTGACCCACGCTCCAAGCATCATTTGGATGTGTTTCCTTACTGCACCTGGGAG  
CAATATGACGAAATAAGGCCAACAATTTACAGATTGGTTTTCAAGGATCATGAGCCTT  
GAAGATAAACCTCTGTTTTTTTGTGTTCCTTCAATATTTGTCCGTTTGTTC
